# Supplementary material
Source: PubMed Central journal article supplement (PMC3370542)
Supplement: supp_78.12.4141_AEM00470-12_supplemental.pdf [file supp_78.12.4141_AEM00470-12_supplemental.pdf]

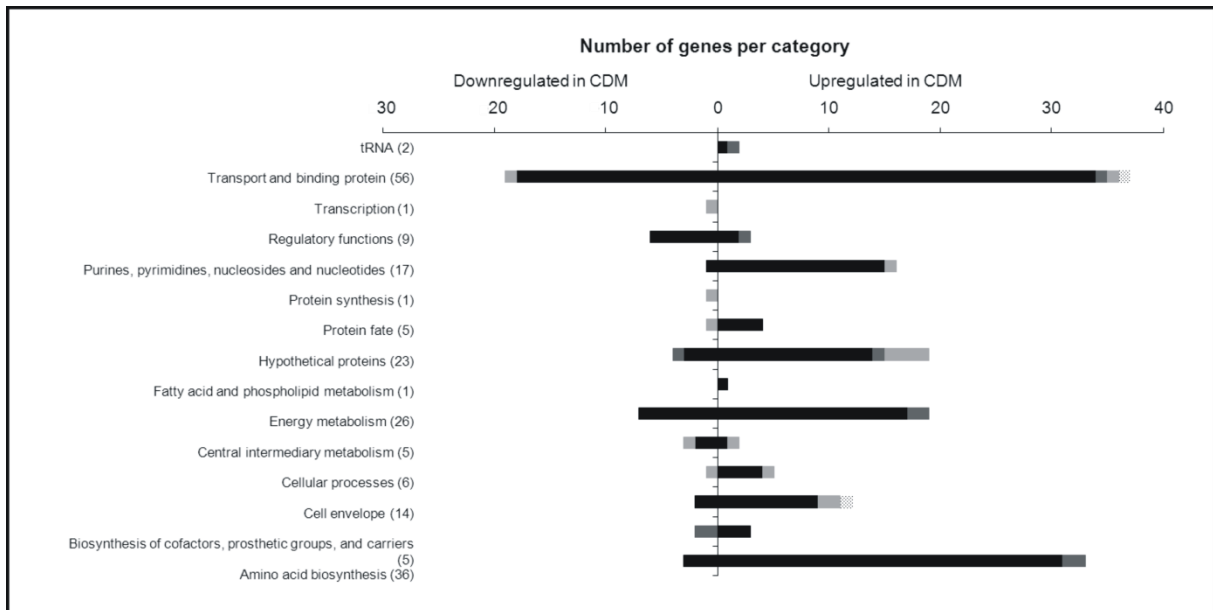

1  
 2 **FIG S1** *L. plantarum* WCFS1 genes in functional groups that were up-regulated and down-  
 3 regulated in CDM compared to MRS grown cells, using total RNA (dark grey), enriched  
 4 mRNA (light grey) and both (black). Dotted grey bar represent genes with opposite transcript  
 5 direction between total RNA and enriched mRNA.

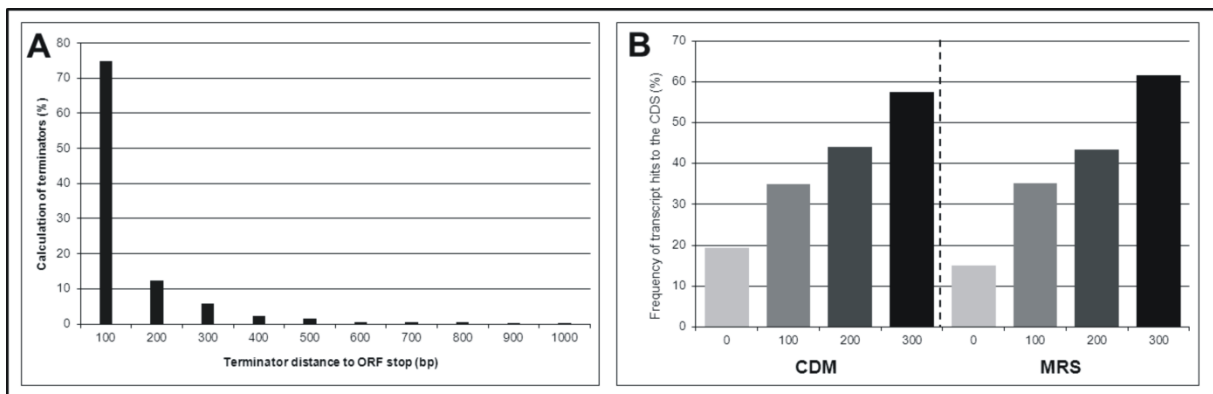

7  
 8 **FIG S2** Distance of predicted terminators downstream of protein encoding genes employed  
 9 for the prediction for 3'-UTR length of *L. plantarum* WCFS1 (panel A) and increase of 3'-  
 10 UTR sequencing transcripts mapping percentage to the CDS based on 100bp, 200bp and  
 11 300bp extension (panel B)

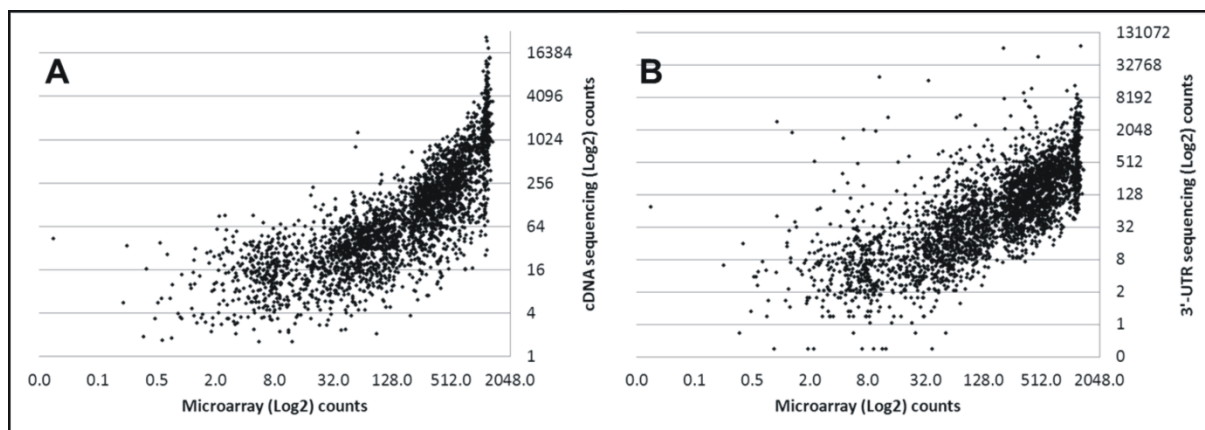

12

13 **FIG S3** Comparison of mean-normalized values between signal intensity of microarray (X

14 axis) and number of read counts (Y-axis) of direct cDNA sequencing (panel A) and 3'-UTR

15 sequencing (panel B) in CDM. A saturation range was observed for the highest expression

16 values obtained by microarray analysis, while the read counts of direct cDNA and 3'-UTR

17 sequencings still appeared to be within the dynamic range of the technology.

18

19 **TABLE S1** RNA-sequencing analysis summary of direct cDNA sequencing and 3'-UTR

20 sequencing of *L. plantarum* WCFS1 grown in CDM or MRS

|                                   | Direct cDNA sequencing |       |              |       | 3'-UTR sequencing |       |              |       |
|-----------------------------------|------------------------|-------|--------------|-------|-------------------|-------|--------------|-------|
|                                   | CDM                    |       | MRS          |       | CDM               |       | MRS          |       |
|                                   | <i>Reads</i>           | %     | <i>Reads</i> | %     | <i>Reads</i>      | %     | <i>Reads</i> | %     |
| Total no. of reads                | 25,980,870             | 99.65 | 28,117,544   | 99.79 | 17,542,374        | 94.58 | 27,268,505   | 95.49 |
| No. of reads mapped to the genome | 25,112,191             | 96.66 | 27,488,120   | 97.76 | 16,628,389        | 94.79 | 25,392,216   | 93.12 |
| No. of reads mapped to CDS        | 14,616,459             | 56.26 | 18,547,758   | 65.97 | 3,388,642         | 19.32 | 4,106,265    | 15.06 |
| No of reads mapped to non-CDS     | 10,495,732             | 40.40 | 8,940,362    | 31.80 | 13,239,747        | 75.47 | 21,285,951   | 78.06 |

21 **TABLE S2** An example of operon predictions which show increase in the frequency of mapped sequence reads at the last gene or the gene next to the  
 22 3'-UTR after mapping extension of 100bp (highlighted in grey).

| Gene ID | Gene name | Function                                                                                            | Category                             | CDM normal                         | MRS normal | CDM + 100bp | MRS + 100bp |       |
|---------|-----------|-----------------------------------------------------------------------------------------------------|--------------------------------------|------------------------------------|------------|-------------|-------------|-------|
| lp_0643 | lp_0643   | prophage P1 protein 20                                                                              | Phage and prophage related functions | 14                                 | 14         | 16          | 13          |       |
| lp_0644 | lp_0644   | prophage P1 protein 21                                                                              |                                      | 1                                  | 0          | 1           | 1           |       |
| lp_0645 | lp_0645   | prophage P1 protein 23                                                                              |                                      | 11                                 | 18         | 5           | 11          |       |
| lp_0646 | lp_0646   | prophage P1 protein 24                                                                              |                                      | 18                                 | 13         | 19          | 15          |       |
| lp_0647 | lp_0647   | prophage P1 protein 25                                                                              |                                      | 19                                 | 13         | 19          | 10          |       |
| lp_0648 | lp_0648   | prophage P1 protein 26                                                                              |                                      | 7                                  | 3          | 7           | 4           |       |
| lp_0649 | lp_0649   | prophage P1 protein 27                                                                              |                                      | 1                                  | 10         | 1           | 10          |       |
| lp_0650 | lp_0650   | prophage P1 protein 28                                                                              |                                      | 10                                 | 3          | 12          | 3           |       |
| lp_0651 | lp_0651   | prophage P1 protein 29                                                                              |                                      | 7                                  | 1          | 7           | 7           |       |
| lp_0652 | lp_0652   | prophage P1 protein 30                                                                              |                                      | 3                                  | 9          | 5           | 17          |       |
| lp_0653 | lp_0653   | prophage P1 protein 31                                                                              |                                      | 9                                  | 15         | 11          | 20          |       |
| lp_0654 | lp_0654   | prophage P1 protein 32                                                                              |                                      | 19                                 | 32         | 22          | 35          |       |
| lp_0655 | lp_0655   | prophage P1 protein 33, phage transcriptional regulator, ArpU family                                |                                      | 18                                 | 40         | 11760       | 13765       |       |
| lp_2719 | purD      | phosphoribosylamine--glycine ligase                                                                 |                                      | Purine ribonucleotide biosynthesis | 1694       | 49          | 6436        | 14373 |
| lp_2720 | purH      | bifunctional protein: phosphoribosylaminoimidazolecarboxamide formyltransferase; IMP cyclohydrolase |                                      |                                    | 753        | 47          | 742         | 48    |
| lp_2721 | purN      | phosphoribosylglycinamide formyltransferase                                                         | 233                                  |                                    | 18         | 260         | 18          |       |
| lp_2722 | purM      | phosphoribosylformylglycinamide cyclo-ligase                                                        | 517                                  |                                    | 38         | 517         | 38          |       |
| lp_2723 | purF      | amidophosphoribosyltransferase precursor                                                            | 886                                  |                                    | 100        | 885         | 96          |       |
| lp_2724 | purI      | phosphoribosylformylglycinamide synthase II                                                         | 710                                  |                                    | 87         | 730         | 88          |       |
| lp_2725 | purQ      | phosphoribosylformylglycinamide synthase I                                                          | 98                                   |                                    | 26         | 111         | 29          |       |
| lp_2726 | purS      | phosphoribosylformylglycinamide synthase, PurS component                                            | 48                                   |                                    | 7          | 51          | 3           |       |
| lp_2727 | purC      | phosphoribosylaminoimidazole-succinocarboxamide synthase                                            | 90                                   |                                    | 14         | 104         | 19          |       |
| lp_2728 | purK1     | phosphoribosylaminoimidazole carboxylase, ATPase subunit                                            | 159                                  |                                    | 40         | 153         | 41          |       |
| lp_2729 | pure      | phosphoribosylaminoimidazole carboxylase, catalytic subunit                                         | 94                                   |                                    | 22         | 109         | 24          |       |
| lp_1672 | acpA2     | acyl carrier protein                                                                                | Fatty acid biosynthesis              |                                    | 433        | 1318        | 476         | 1401  |
| lp_1673 | fabD      | (acyl-carrier protein) S-malonyltransferase                                                         |                                      |                                    | 949        | 1698        | 949         | 1690  |
| lp_1674 | fabG1     | 3-oxoacyl-(acyl-carrier protein) reductase                                                          |                                      |                                    | 500        | 1067        | 566         | 1209  |
| lp_1675 | fabF      | 3-oxoacyl-(acyl-carrier protein) synthase II                                                        |                                      |                                    | 1454       | 2194        | 1455        | 2211  |
| lp_1676 | accB2     | acetyl-CoA carboxylase, biotin carboxyl carrier protein                                             |                                      | 392                                | 970        | 381         | 965         |       |
| lp_1677 | fabZ2     | (3R)-hydroxymyristoyl-(acyl carrier protein) dehydratase                                            |                                      | 374                                | 746        | 431         | 839         |       |
| lp_1678 | accC2     | acetyl-CoA carboxylase, biotin carboxylase subunit                                                  |                                      | 1974                               | 2518       | 2000        | 2558        |       |
| lp_1679 | accD2     | acetyl-CoA carboxylase, carboxyl transferase subunit beta                                           |                                      | 724                                | 1012       | 758         | 1074        |       |
| lp_1680 | accA2     | acetyl-CoA carboxylase, carboxyl transferase subunit alpha                                          |                                      | 925                                | 1523       | 976         | 1606        |       |
| lp_1681 | fabI      | enoyl-(acyl-carrier protein) reductase (NADH)                                                       |                                      | 572                                | 806        | 528         | 760         |       |
| lp_1682 | lp_1682   | Phosphopantetheinyltransferase                                                                      |                                      | 3475                               | 4049       | 5079        | 7654        |       |
